# Supplementary material
Source: publisher figshare collection journal article supplement (https://acs.figshare.com/ndownloader/files/12860183)
Supplement: Supplementary file 1 [file 12860183]

## Supporting Information

# A Catalyst-Free Epoxy Vitrimer System Based on Multifunctional Hyperbranched Polymer

Jiarui Han,<sup>‡a,b</sup> Tuan Liu,<sup>‡b</sup> Cheng Hao,<sup>b</sup> Shuai Zhang,<sup>b</sup> Baohua Guo,<sup>\*,a</sup> Jinwen Zhang<sup>\*,b</sup>

<sup>a</sup> Key Laboratory of Advanced Materials of Ministry of Education, Department of Chemical Engineering, Tsinghua University, Beijing, 100084, China

<sup>b</sup> School of Mechanical and Materials Engineering, Composite Materials and Engineering Center, Washington State University, Pullman, Washington 99164, United States

<sup>‡</sup> Jiarui Han and Tuan Liu contributed equally to this work.

Corresponding authors: [jwzhang@wsu.edu](mailto:jwzhang@wsu.edu) (J.Z.) and [bhguo@mail.tsinghua.edu.cn](mailto:bhguo@mail.tsinghua.edu.cn) (B.G)

**Table S1** Formulations for the preparation of vitrimer materials and the amount of heat released during the DSC test.

| Sample <sup>a</sup> | HBE<br>(g) | SA<br>(g) | Zn(acac) <sub>2</sub> <sup>b</sup><br>(mg) | $\Delta H^c$<br>(J/g) |
|---------------------|------------|-----------|--------------------------------------------|-----------------------|
| HBE-1-SA            | 1          | 0.14      | -                                          | 108.9                 |
| HBE-2-SA            | 1          | 0.13      | -                                          | 106.8                 |
| HBE-2-SA-CAT        | 1          | 0.13      | 34.0                                       | 106.3                 |
| DER-SA-CAT          | 1          | 0.27      | 69.9                                       | 180.9                 |

<sup>a</sup>epoxy/anhydride (mol/mol) = 2/1; <sup>b</sup>For comparison, vitrimers containing Zn(acac)<sub>2</sub> catalysts were also prepared, and the catalyst was added at an amount of 10 mol% on the bases of SA; <sup>c</sup> $\Delta H$  values were obtained from DSC test.

**Table S2** Properties of HBE and DER 331.

|        | Reaction Time<br>(h) | Epoxy Value<br>(mol/100 g) | Hydroxyl Value<br>(mol/100g) | $M_w^a$ | PDI  | $T_g^b$<br>(°C) |
|--------|----------------------|----------------------------|------------------------------|---------|------|-----------------|
| DER331 | -                    | 0.53                       | 0.065                        | -       | -    | -22             |
| HBE-1  | 16                   | 0.29                       |                              | 2182    | 1.40 | 39              |
| HBE-2  | 48                   | 0.26                       | 0.231                        | 9334    | 2.78 | 44              |

<sup>a</sup> $M_w$  is weight-average molecular weight determined from the GPC test; <sup>b</sup> $T_g$  values were determined from the DSC test.

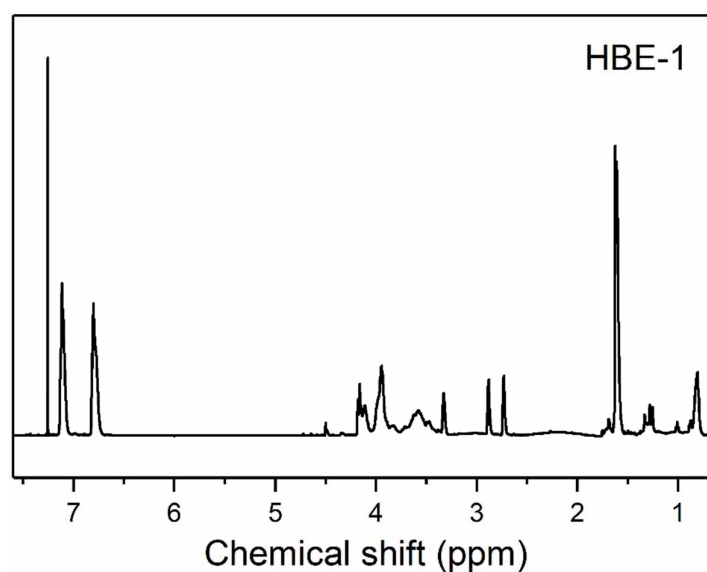

**Figure S1** <sup>1</sup>H NMR spectra of HBE-1.

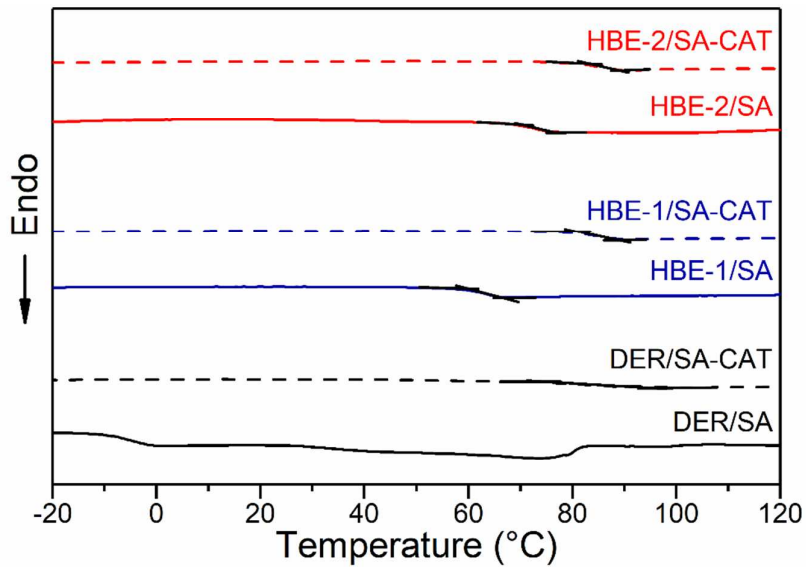

**Figure S2** DSC heating curves of different curing systems at a rate of 5 °C/min under nitrogen atmosphere.

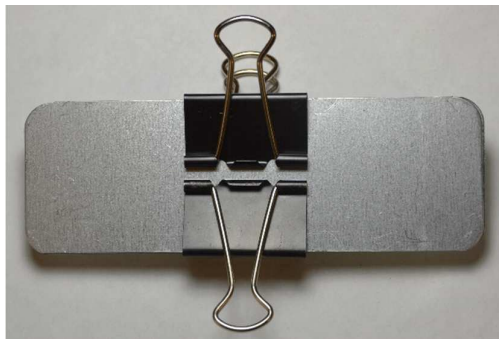

**Figure S3** The setup for testing self-healing behavior of the cured HBE/SA and DER/SA-CAT. Samples were sandwiched between the two tin plates. The self-healing test was conducted in a convection oven at 150 °C for different times.

**Table S3** Coating Properties of HBE-2/SA

| Sample   | Thickness<br>( $\mu\text{m}$ ) | Gouge<br>Hardness <sup>a</sup> | Scratch<br>Hardness <sup>a</sup> | Adhesion<br>Test <sup>b</sup> |
|----------|--------------------------------|--------------------------------|----------------------------------|-------------------------------|
| HBE-2/SA | 80                             | 6H                             | 4H                               | 5B                            |

<sup>a</sup>Hardness was tested according to ASTM D3363-05 Standard

<sup>b</sup>Adhesion was tested according to ASTM D3359-17 Standard (test method B)

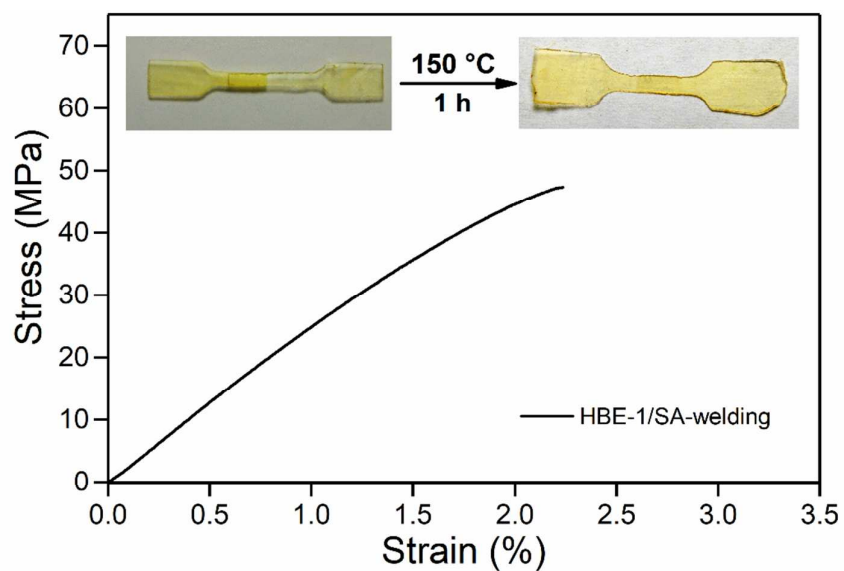

**Figure S4** Stress-Strain curves of welded HBE-1/SA sample. The inset photo shows the sample before and after welding

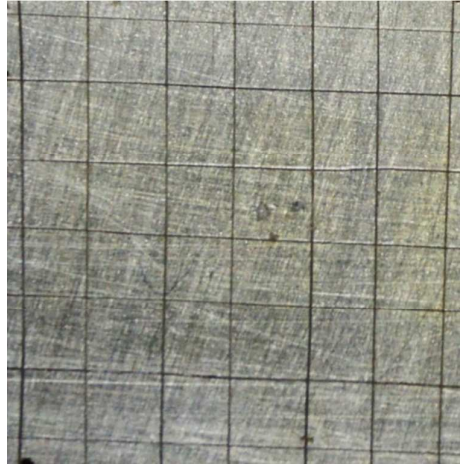

**Figure S5** The digital photo of the sample after taping test according ASTM D3359-17 (test method B).

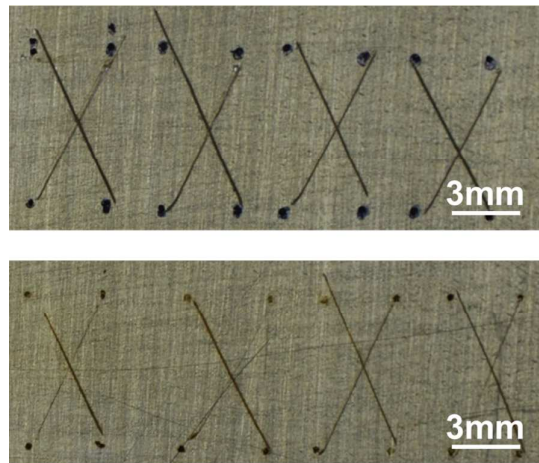

**Figure S6** The digital photo of control (upper) and self-healed (bottom) scratched coatings on tin plates.
